# Supplementary material
Source: PubMed Central journal article supplement (PMC1783144)
Supplement: pnas_0601378104_2.pdf [file pnas_0601378104_2.pdf]

**Table 2. Basal parameters for the expanded model**

| <b>Name</b> | <b>Value</b> | <b>Description</b>                                         |
|-------------|--------------|------------------------------------------------------------|
| $v_{mp}$    | 5            | Maximum rate of synthesis of <i>per</i> mRNA               |
| $v_{mt}$    | 5            | Maximum rate of synthesis of <i>tim</i> mRNA               |
| $v_{mc}$    | 0.125        | Maximum rate of synthesis of <i>dClk</i> mRNA              |
| $k_{dmp}$   | 0.5          | First-order rate constant for <i>per</i> mRNA degradation  |
| $k_{dmt}$   | 0.5          | First-order rate constant for <i>tim</i> mRNA degradation  |
| $k_{dmc}$   | 0.5          | First-order rate constant for <i>dClk</i> mRNA degradation |
| $v_p$       | 2.5          | Rate constant for translation of <i>per</i> mRNA           |
| $v_t$       | 2.5          | Rate constant for translation of <i>tim</i> mRNA           |
| $v_c$       | 2.5          | Rate constant for translation of <i>dClk</i> mRNA          |
| $k_{p1}$    | 50           | $V_{max}$ for monomeric PER phosphorylation                |
| $k_{p2}$    | 0.15         | $V_{max}$ for dimeric PER phosphorylation                  |
| $k_{p3}$    | 0.5          | First-order rate constant for proteolysis of PER           |
| $k_{t3}$    | 0.5          | First-order rate constant for proteolysis of TIM           |
| $k_{dc}$    | 0.5          | First-order rate constant for proteolysis of dCLK          |
| $k_{app}$   | 50           | Association rate const for PER-PER homodimerization        |
| $k_{dpp}$   | 0.5          | Dissociation rate const for PER-PER homodimers             |
| $k_{apt}$   | 50           | Association rate const for PER-TIM heterodimerization      |
| $k_{dpt}$   | 0.5          | Dissociation rate const for PER-TIM heterodimers           |
| $k_{acc}$   | 50           | Association rate const for CYC-dCLK heterodimerization     |
| $k_{dcc}$   | 0.5          | Dissociation rate const for CYC-dCLK heterodimers          |
| $k_{aitf}$  | 50           | Association rate const for PER—CYC-dCLK complex            |
| $k_{ditf}$  | 0.5          | Dissociation rate const for PER—CYC-dCLK complex           |
| $k_{in}$    | 5            | Nuclear import rate constant                               |
| $k_{out}$   | 0.5          | Nuclear export rate constant                               |
| $K_1$       | 1            | Michaelis constant for synthesis of <i>per</i> mRNA        |
| $K_2$       | 1            | Michaelis constant for synthesis of <i>tim</i> mRNA        |
| $m$         | 7            | Hill exponent of <i>per</i> and <i>tim</i> mRNA synthesis  |

| <b>Name</b>      | <b>Value</b> | <b>Description</b>                                |
|------------------|--------------|---------------------------------------------------|
| $n$              | 2            | Hill exponent of <i>dclk</i> mRNA synthesis       |
| $Y_{\text{tot}}$ | 10           | Total concentration of CYCLE protein              |
| $J_p$            | 0.05         | Michaelis constant for protein kinase (DBT)       |
| $k$              | 0.1          | A constant for the activity of dCLK feedback loop |
