# Supplementary material
Source: PubMed Central journal article supplement (PMC1783144)
Supplement: pnas_0601378104_3.pdf [file pnas_0601378104_3.pdf]

**Table 3. Basal values of thermodynamic parameters**

| <b>LG</b>         |                 |                 |
|-------------------|-----------------|-----------------|
| <b><i>par</i></b> | <b><i>E</i></b> | <b><i>s</i></b> |
| $v_s$             | 9               | -9              |
| $v_m$             | 10              | -10             |
| $K_i$             | 19              | 19              |
| $K_m$             | 13              | 12.3069         |
| $n$               | 0               | 0               |
| $k_s$             | 11              | -11             |
| $V_1$             | 11              | -11             |
| $K_1$             | 8               | 8.69315         |
| $V_2$             | 13              | -13             |
| $K_2$             | 12              | 12.6931         |
| $V_3$             | 7               | -7              |
| $K_3$             | 10              | 10.6931         |
| $V_4$             | 10              | -10             |
| $K_4$             | 6               | 6.69315         |
| $k_{in}$          | 10              | -10             |
| $k_{out}$         | 6               | -6              |
| $v_d$             | 10              | -10             |
| $K_d$             | 7               | 5.39056         |

  

| <b>TH</b>         |                              |                 |
|-------------------|------------------------------|-----------------|
| <b><i>par</i></b> | <b><math>\epsilon</math></b> | <b><i>s</i></b> |
| $v_m$             | 4                            | -4              |
| $k_m$             | 3                            | -3              |
| $v_p$             | 11                           | -11             |
| $k_{p1}$          | 6                            | -6              |
| $k_{p2}$          | 13                           | -13             |
| $k_{p3}$          | 4                            | -4              |

|                                      |         |         |
|--------------------------------------|---------|---------|
| $J_p$                                | 5       | 2.00427 |
| $P_{crit}$                           | 19      | 16.6974 |
| $K_{eq}$                             | 7       | 12.2983 |
| <b>with these changes for<br/>RS</b> |         |         |
| $P_{crit}$                           | 19      | 18.4892 |
| $K_{eq}$                             | 7       | 7       |
| $\mu$                                | 10      | -10     |
| $\sigma$                             | -6.9315 | -7.6246 |

$\Delta G = 298 \cdot R(\varepsilon - \theta s / 298)$ . The two thermodynamic parameters,  $\varepsilon$  and  $s$  (energy and entropy), determine the temperature dependence of rate constants according to Arrhenius' law,  $k_i = k_i^o e^{s_i^\ddagger} e^{-\varepsilon_i^\ddagger \cdot 298 / \theta}$ , and the temperature dependence of equilibrium constants according to the Gibbs equation,  $K_i = e^{s_i^o} e^{-\varepsilon_i^o \cdot 298 / \theta}$ . The energy parameters were chosen to temperature-compensate each model according to Ruoff's rule (see text). For rate constants,  $s_i^\ddagger$  was (arbitrarily) set  $= -\varepsilon_i^\ddagger$ , whereas for equilibrium constants  $s_i^o = \varepsilon_i^o + \ln K_i(298)$ . These energies and entropies of reaction depend on the biophysical properties of genetically encoded proteins and are therefore genetically modifiable. Test II models mutations by random perturbations of  $\varepsilon_i$  and  $s_i$ .
