# Supplementary material
Source: PubMed Central journal article supplement (PMC1783144)

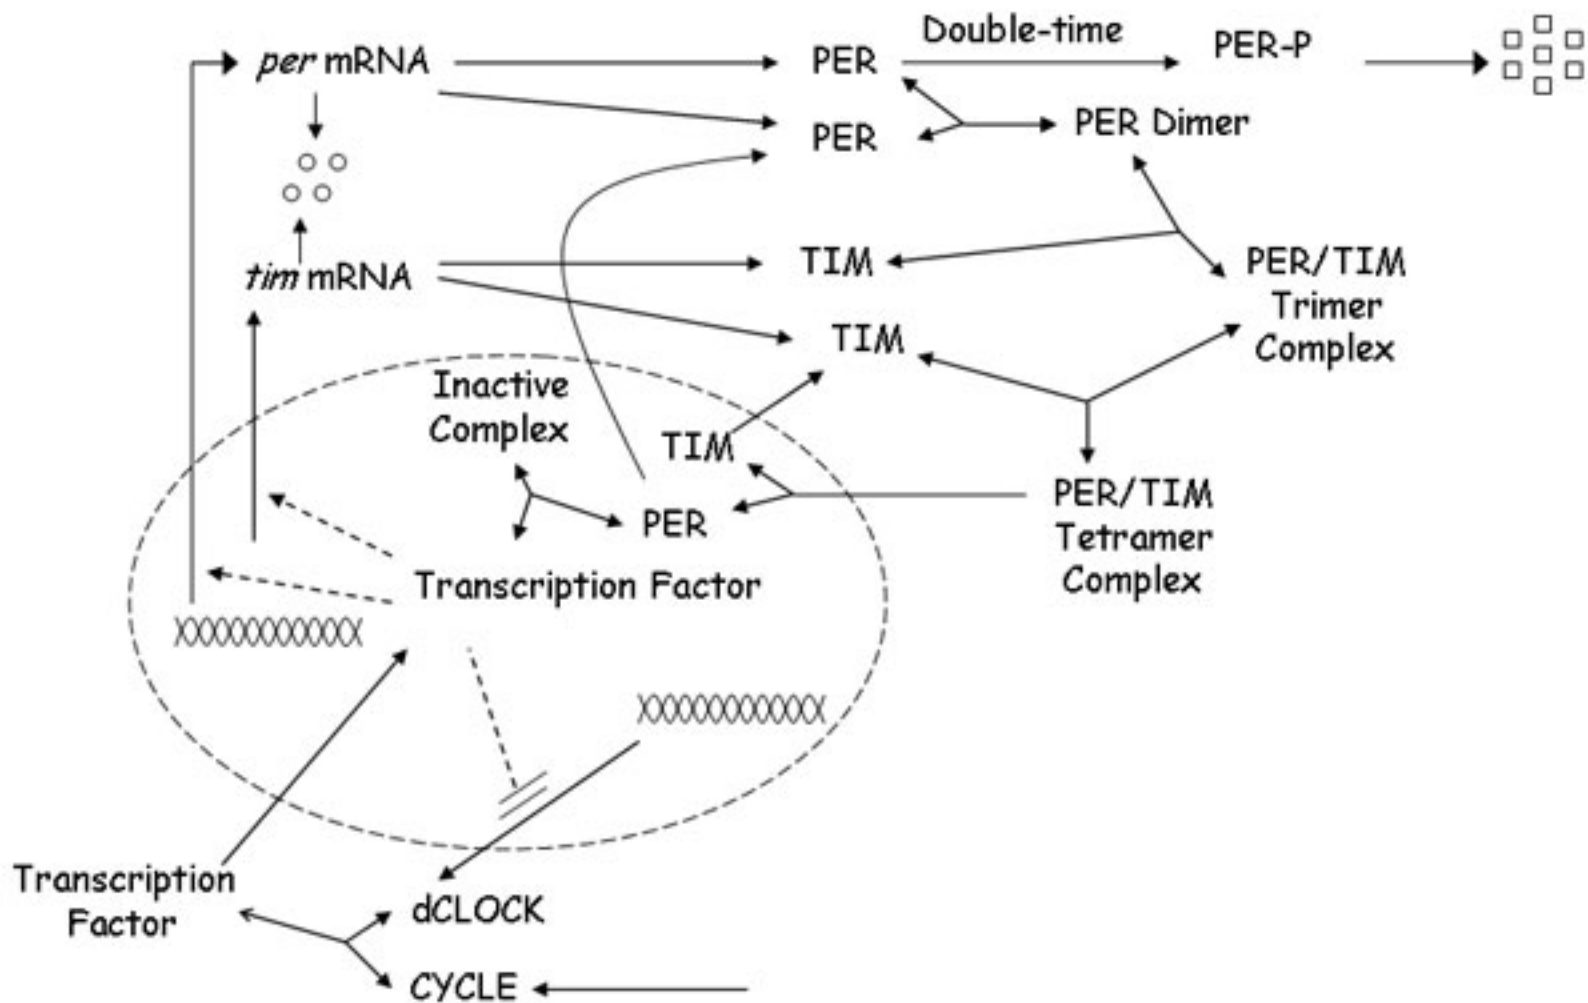

Supplement: pnas_0601378104_5.pdf [file pnas_0601378104_5.pdf]

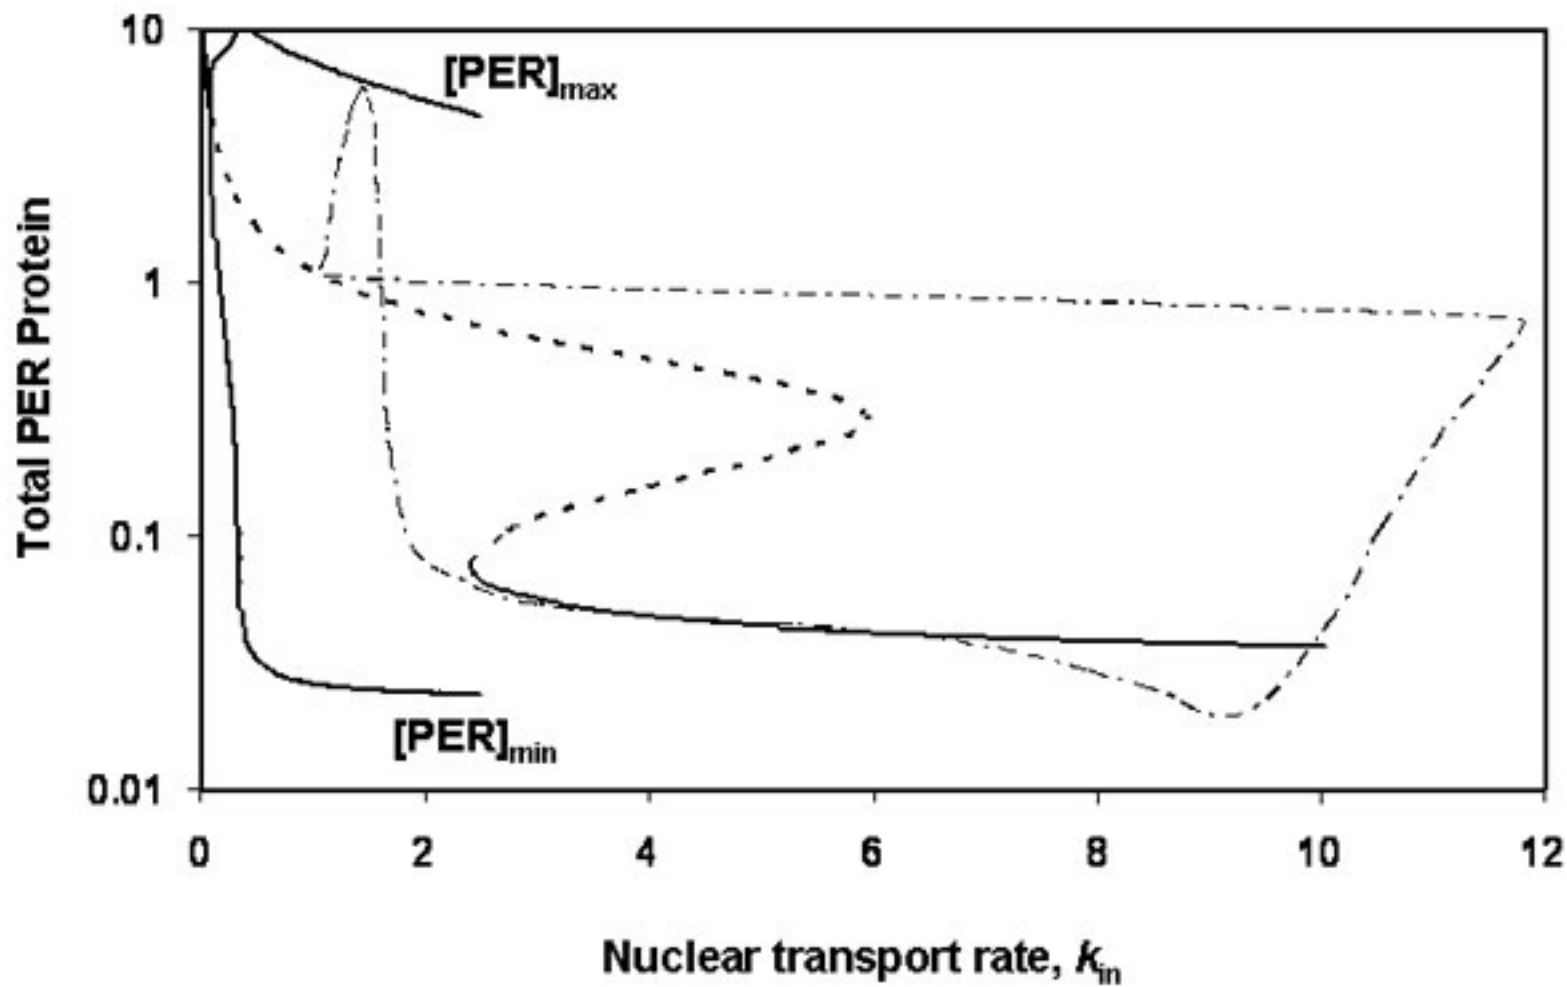

Supplement: pnas_0601378104_6.pdf [file pnas_0601378104_6.pdf]

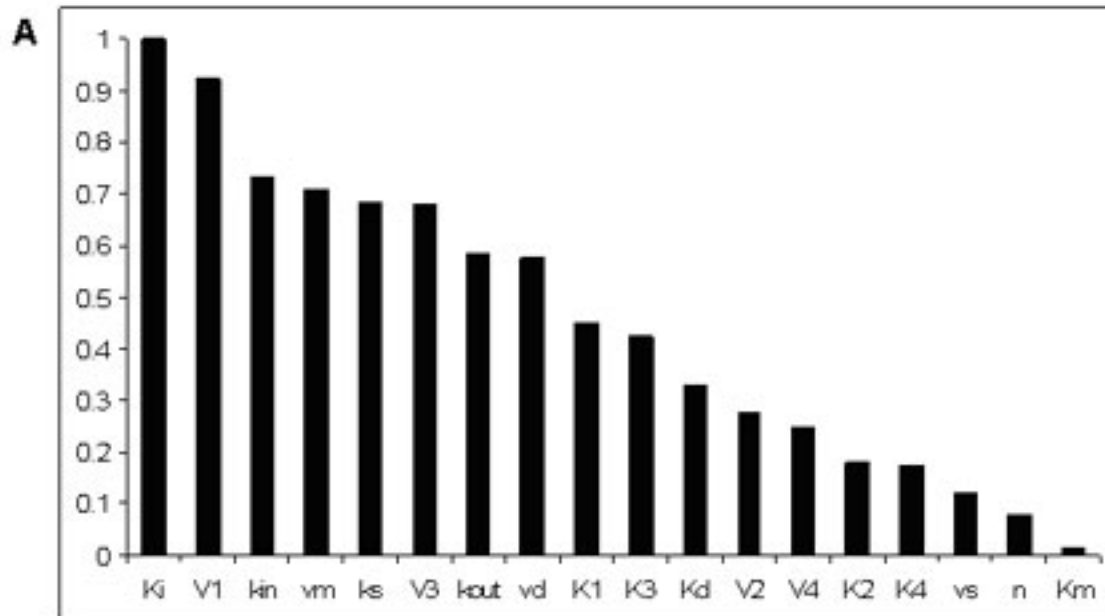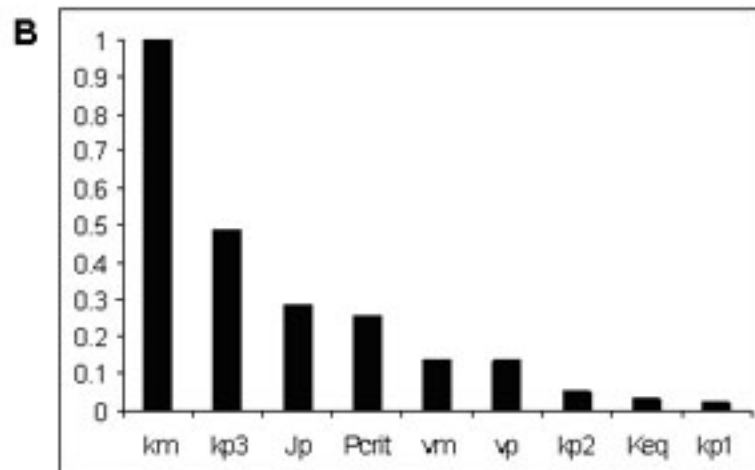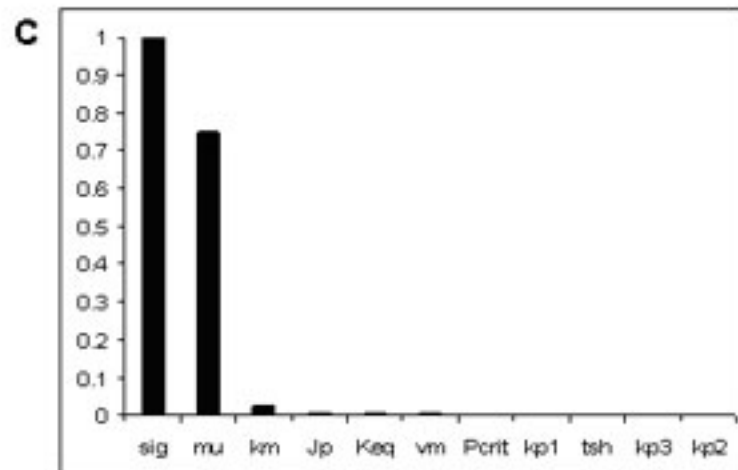

Supplement: pnas_0601378104_7.pdf [file pnas_0601378104_7.pdf]
